# Supplementary material for: Macrophage Polarization Related to Biomimetic Calcium Phosphate Coatings: A Preliminary Study
Source: MDPI journal article supplement (doi:10.3390/ma16010332), 2022-12-29
Supplement: s1 [file s1]

## Supplementary Material

**Table S1.** Primer sequences used for reverse transcription-quantitative polymerase reaction (RT-qPCR).

| Gene                           | 5'-3'   | Sequence                  |
|--------------------------------|---------|---------------------------|
| <i>TNF-<math>\alpha</math></i> | Forward | CCCTCACA CT CAGATCATCTTCT |
|                                | Reverse | GCTACGACGTGGGCTACAG       |
| <i>Arg1</i>                    | Forward | CTCCAAGCCAAAGTCCTTAGAG    |
|                                | Reverse | AGGAGCTGTCATTAGGGACATC    |
| <i>CD206</i>                   | Forward | CTCTGTTCAGCTATTGGACGC     |
|                                | Reverse | CGGAATTTCTGGGATTCAGCTTC   |
| <i>GAPDH</i>                   | Forward | AGGTCGGTGTGAACGGATTTG     |
|                                | Reverse | TGTAGACCATGTAGTTGAGGTCA   |
